# Supplementary material
Source: PubMed Central journal article supplement (PMC10070771)
Supplement: mmc1.pdf [file mmc1.pdf]

Cell Reports, Volume 42

## Supplemental information

### **Vaccination provides superior *in vivo* recall capacity of SARS-CoV-2-specific memory CD8 T cells**

**Inga Kavazović, Christoforos Dimitropoulos, Dora Gašparini, Mari Rončević Filipović, Igor Barković, Jan Koster, Niels A. Lemmermann, Marina Babić, Đurđica Cekinović Grbeša, and Felix M. Wensveen**

# Supplementary Figure 1.

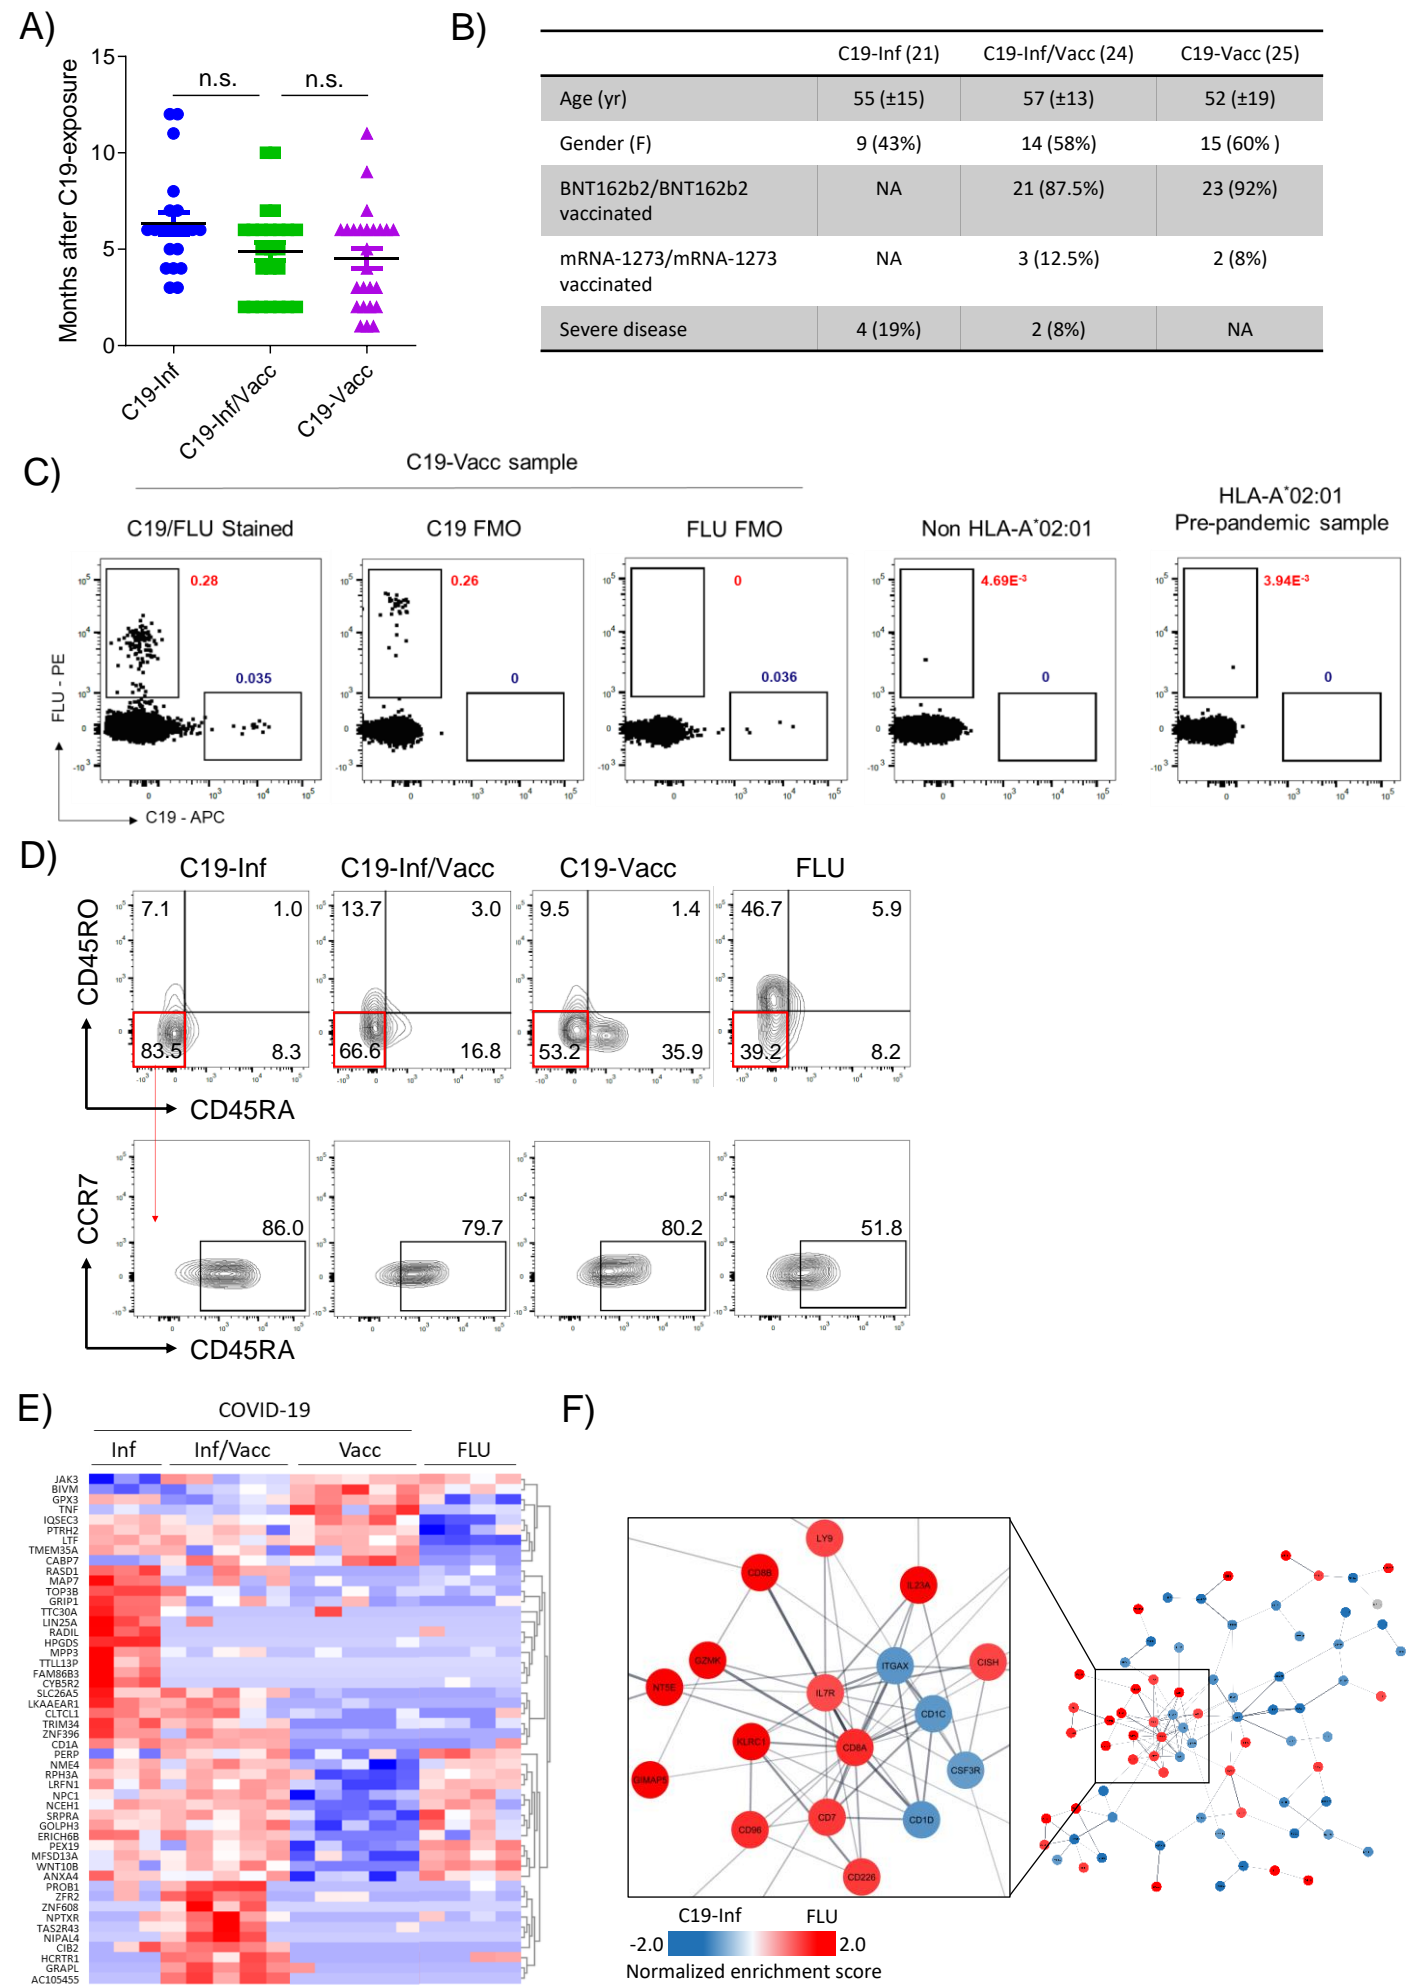

**Supplementary Figure 1. Phenotypic analysis of virus-specific CD8 T cells.** PBMCs from donors were analyzed directly ex vivo. **(A)** Time after last antigen exposure per group. **(B)** Study design. **(C)** Representative FACS plots of CD8<sup>+</sup> T cell staining with HLA-A\*02 tetramers: SARS-CoV-2 (YLQPRTFL) and/or FLU (GILGFVFTL). C19-Vacc sample – non convalescent patient 1 month after 2nd dose of COVID-19 vaccine. FMO - Fluorescence Minus One (FMO) controls. Non HLA-A\*02 - convalescent patient 6 months post COVID-19, negative for HLA-A\*02. HLA-A\*02 Pre-pandemic sample – sample from HLA-A\*02<sup>+</sup> individual obtained before the COVID-19 pandemic. Numbers in the plots indicate percentage of the parental population. **(D)** Representative FACS plots of CD45RO, CCR7 and CD45RA staining on C19- and FLU-specific CD8<sup>+</sup> T cells of indicated groups. Quantification is shown in figure 1C. Numbers in the plots indicate percentages. **(E-F)** C19- and FLU-specific CD8<sup>+</sup> T cells were sorted and analyzed by RNA sequencing. **(E)** Gene expression profile of the 50 most differentially expressed genes between the four groups. **(F)** The 200 most differentially expressed genes between C19-Inf and FLU cells were subjected to protein network clustering. Shown is the largest node network for each comparison. Inset shows the largest subcluster.

# Supplementary Figure 2.

A)

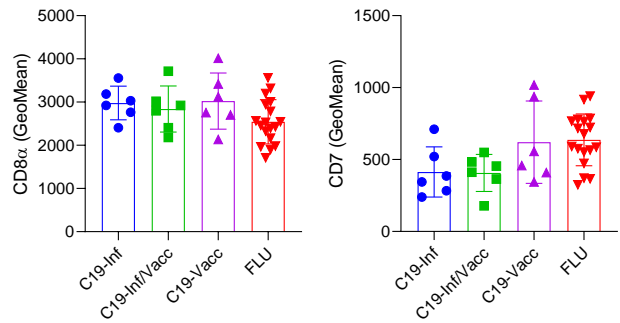

B)

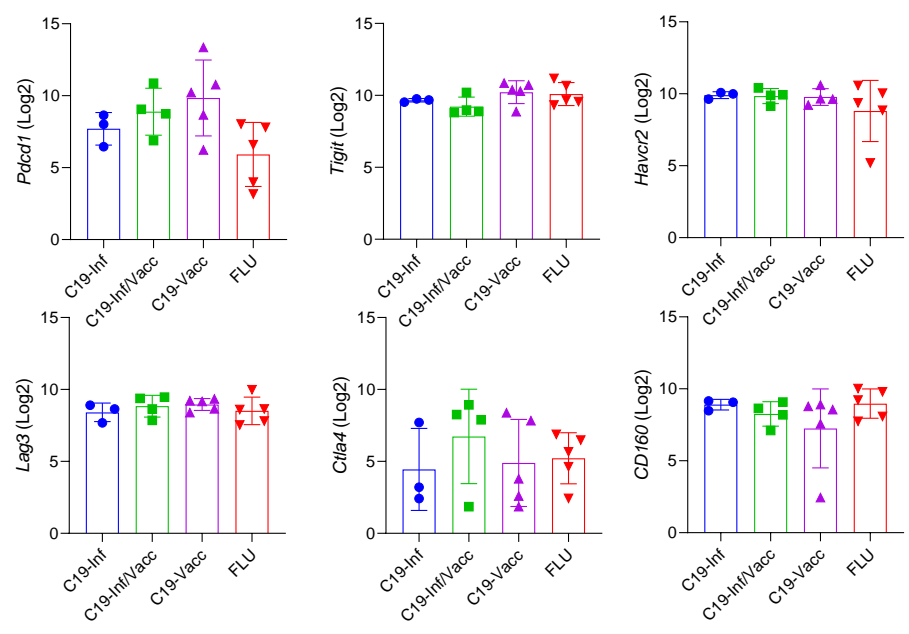

C)

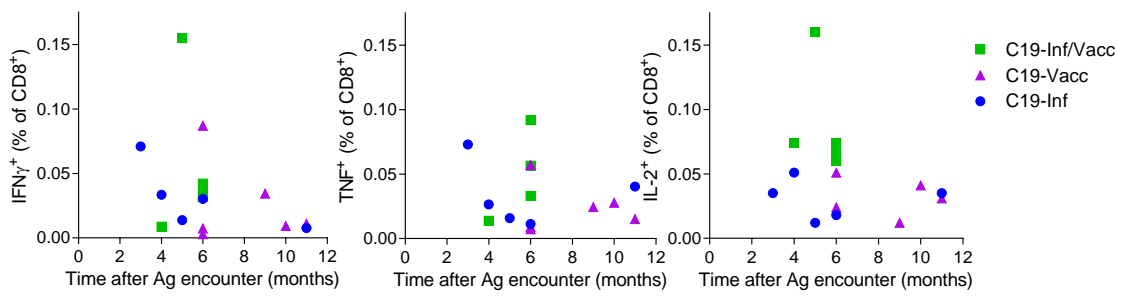

D)

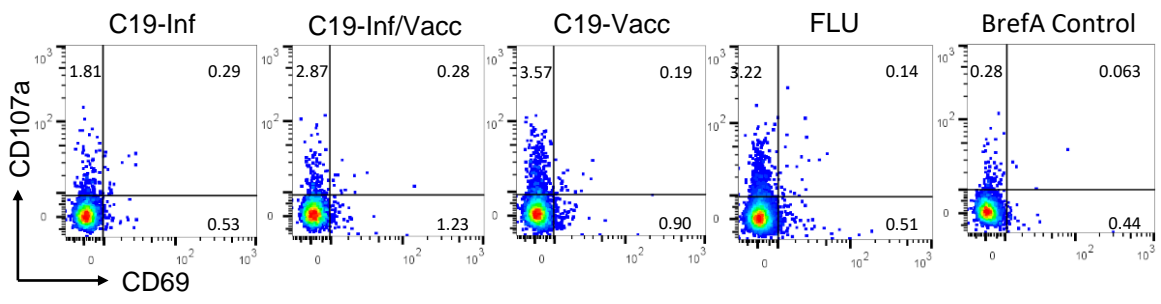

**Supplementary Figure 2. Transcriptional profile of virus-specific CD8 T cells.** (A) Geometric mean fluorescence intensity (GeoMean) of CD96, CD8, KIR2D and CD7 on C19- and FLU-specific CD8<sup>+</sup> T cells by flow cytometry. (B) C19- and FLU-specific CD8<sup>+</sup> T cells were sorted and analyzed by RNA sequencing. Differential expression of individual genes associated with T-cell exhaustion are shown. Indicated are means  $\pm$  s.e.m. Statistical significances at \*p < 0.05, \*\*p < 0.01, \*\*\*p < 0.001 by one-way ANOVA followed by Bonferroni post-testing.

# Supplementary Figure 3.

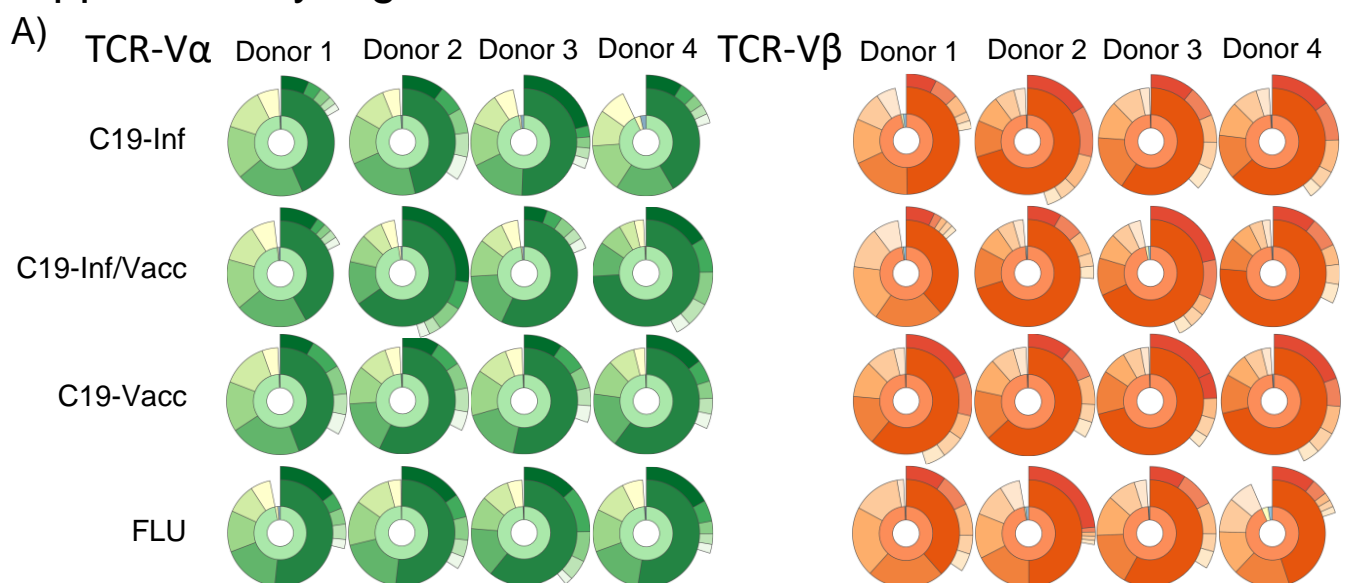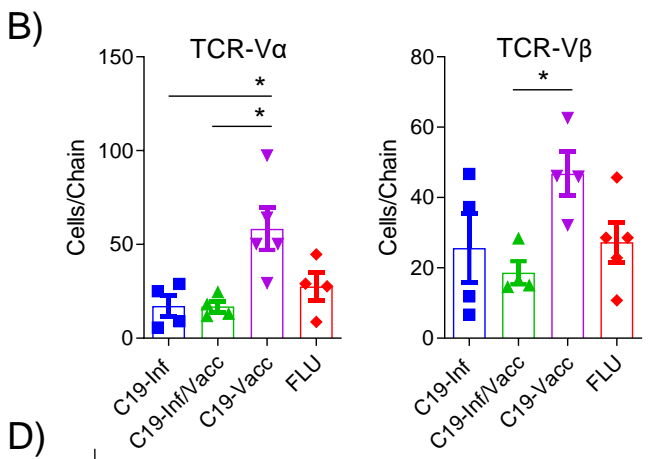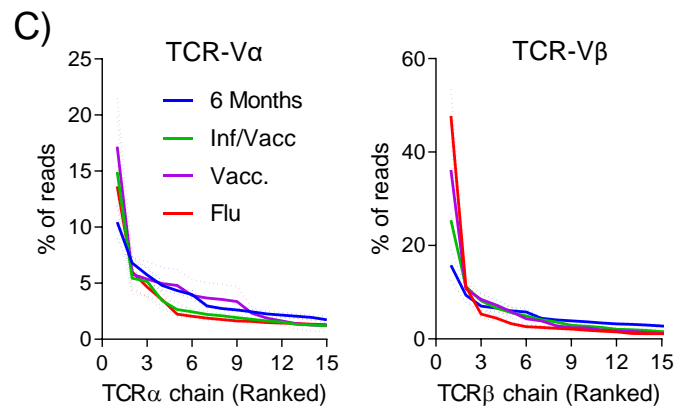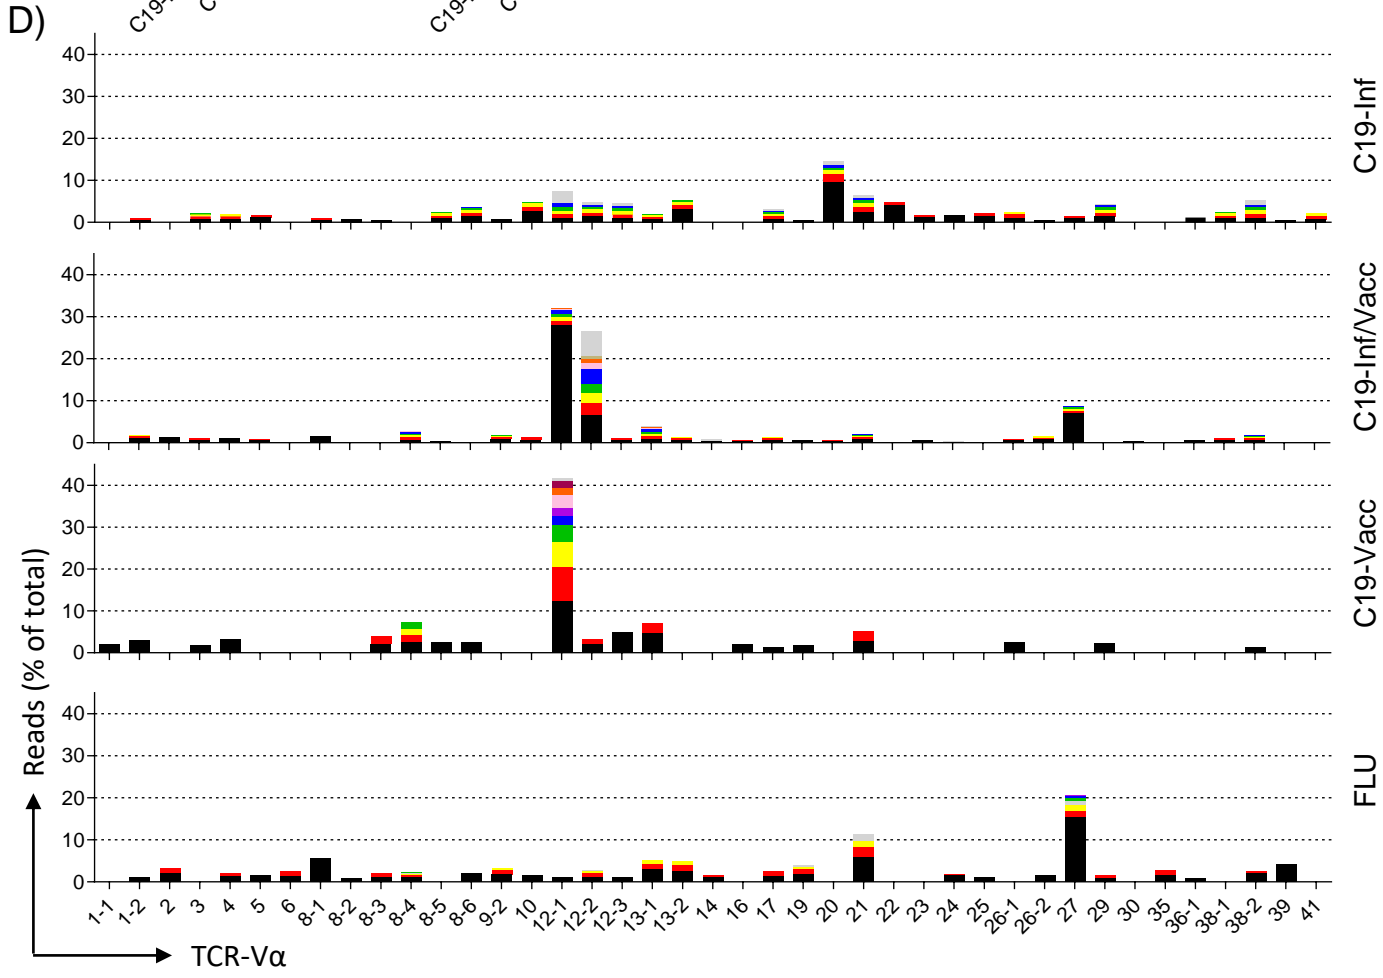

**Supplementary Figure 3. Clonal analysis of virus-specific CD8 T cells.** C19- and FLU-specific CD8<sup>+</sup> T cells were sorted and TCR-V $\beta$  chains were analyzed by RNA sequencing. Contribution of the 15 most dominant TCR-V $\beta$  genes as a percentage of the total number of clones is shown.

# Supplementary Figure 4.

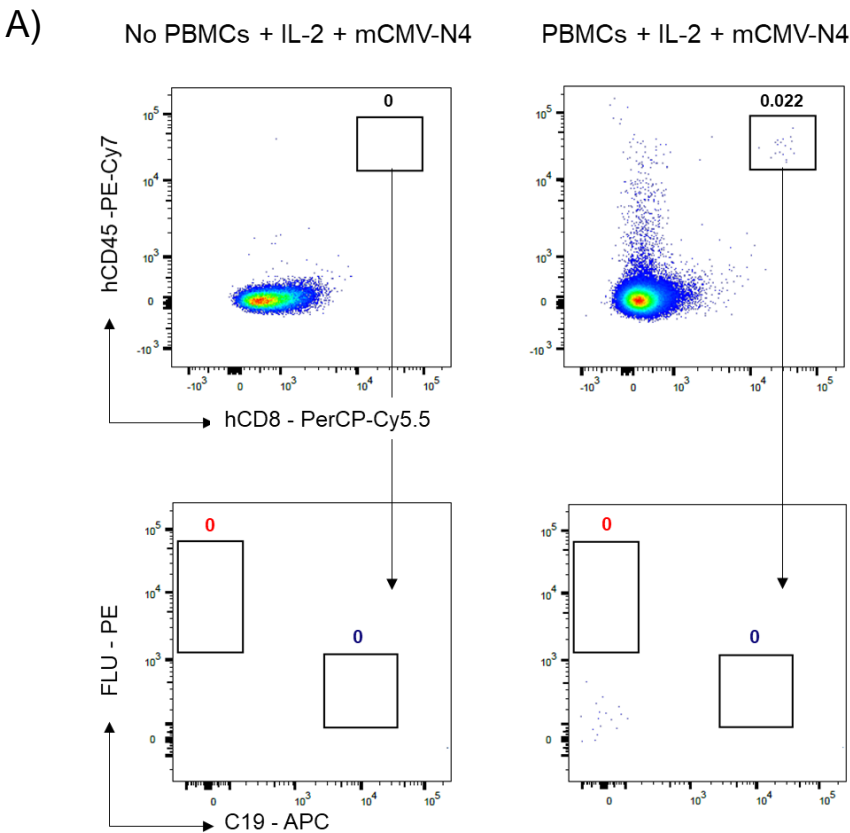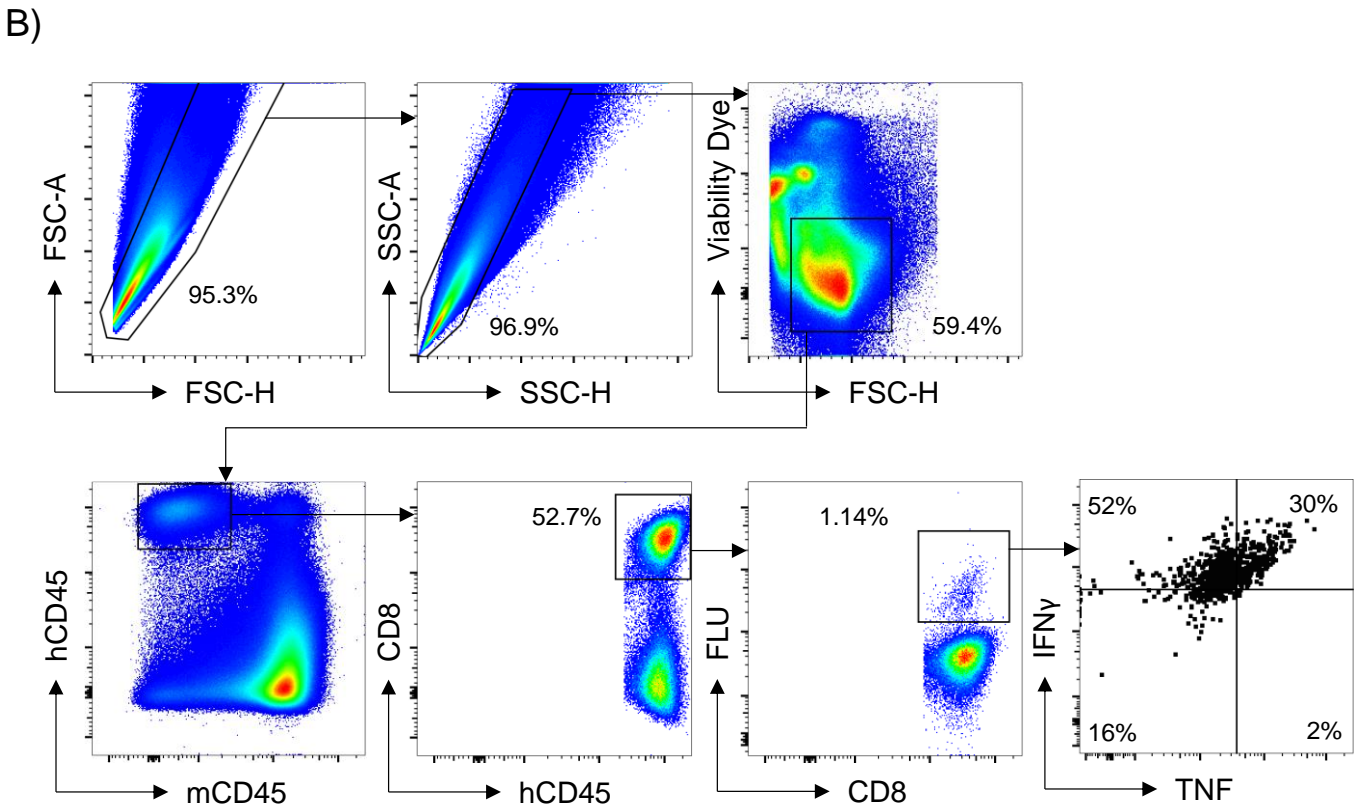



**Supplementary Figure 4. Functional analysis of virus-specific CD8 T cells in vivo.** Representative FACS plots of controls for Figure 5. No PBMCs (left) or PBMCs derived from a C19-vaccinated individual (right) were transferred to NSG-HLA:A\*02 transgenic mice. On the same day, mice were infected i.p. with mCMV-N4. The next day mice were injected i.p. with human IL-2 (100ng/mouse). Mice were sacrificed 7 days post infection and peritoneal exudate cells (PEC) were isolated. FACS plots are showing (top) total live PEC cells and (bottom) live hCD45<sup>+</sup>hCD8<sup>+</sup> T cells stained with HLA-A\*02 tetramers: SARS-CoV-2 (YLQPRTFLL) and FLU (GILGFVFTL).
